# Supplementary material for: Inhibition of oxidative stress in cholinergic projection neurons fully rescues aging-associated olfactory circuit degeneration in Drosophila
Source: eLife journal article supplement (doi:10.7554/elife.32018), 2018-01-17
Supplement: supp [file elife-32018-supp-v1.zip]

Archive with 11 entries (11 files):
- elife_poa_e32018_Figure_4_figure_supplement_1.pdf
- elife_poa_e32018_Figure_4_figure_supplement_2.pdf
- elife_poa_e32018_Figure_4_figure_supplement_3.pdf
- elife_poa_e32018_Supplementary_File_1.docx
- elife_poa_e32018_Figure_2_figure_supplement_2.pdf
- elife_poa_e32018_Figure_2_figure_supplement_3.pdf
- elife_poa_e32018_Transparent_Reporting_Form.pdf
- elife_poa_e32018_Figure_2_figure_supplement_1.pdf
- elife_poa_e32018_Figure_6_figure_supplement_1.pdf
- elife_poa_e32018_Figure_1_figure_supplement_1.pdf
- elife_poa_e32018_Supplementary_File_2.docx
