# Supplementary figures and images for: Inhibition of oxidative stress in cholinergic projection neurons fully rescues aging-associated olfactory circuit degeneration in Drosophila
Source: eLife journal article supplement (doi:10.7554/elife.32018), 2018-01-17

Fig. 4- Fig. Supplement 1

**A**

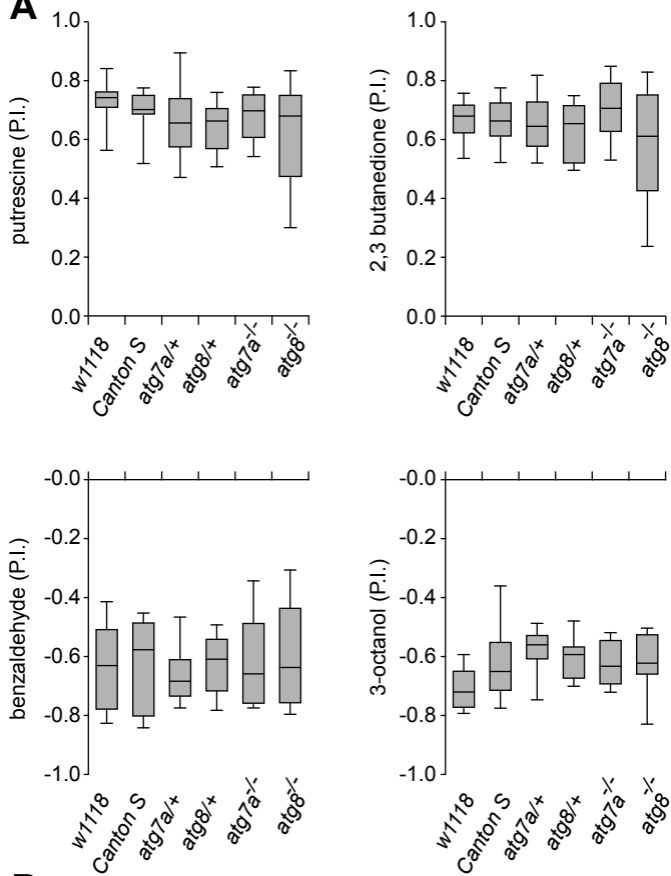

**B**

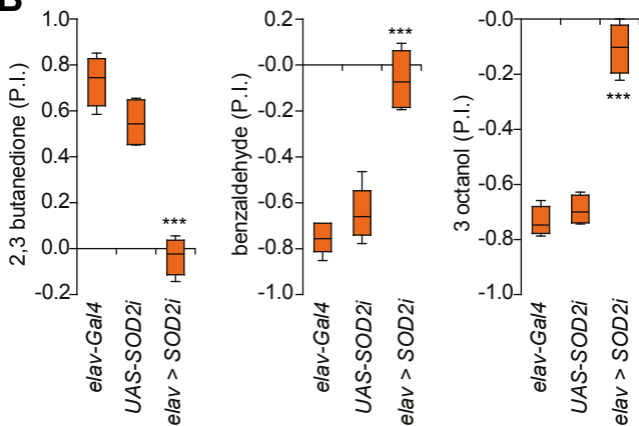

Supplement: supp [file elife-32018-supp-v1.zip › elife_poa_e32018_Figure_4_figure_supplement_1.pdf]

Fig. 4- Fig. Supplement 2

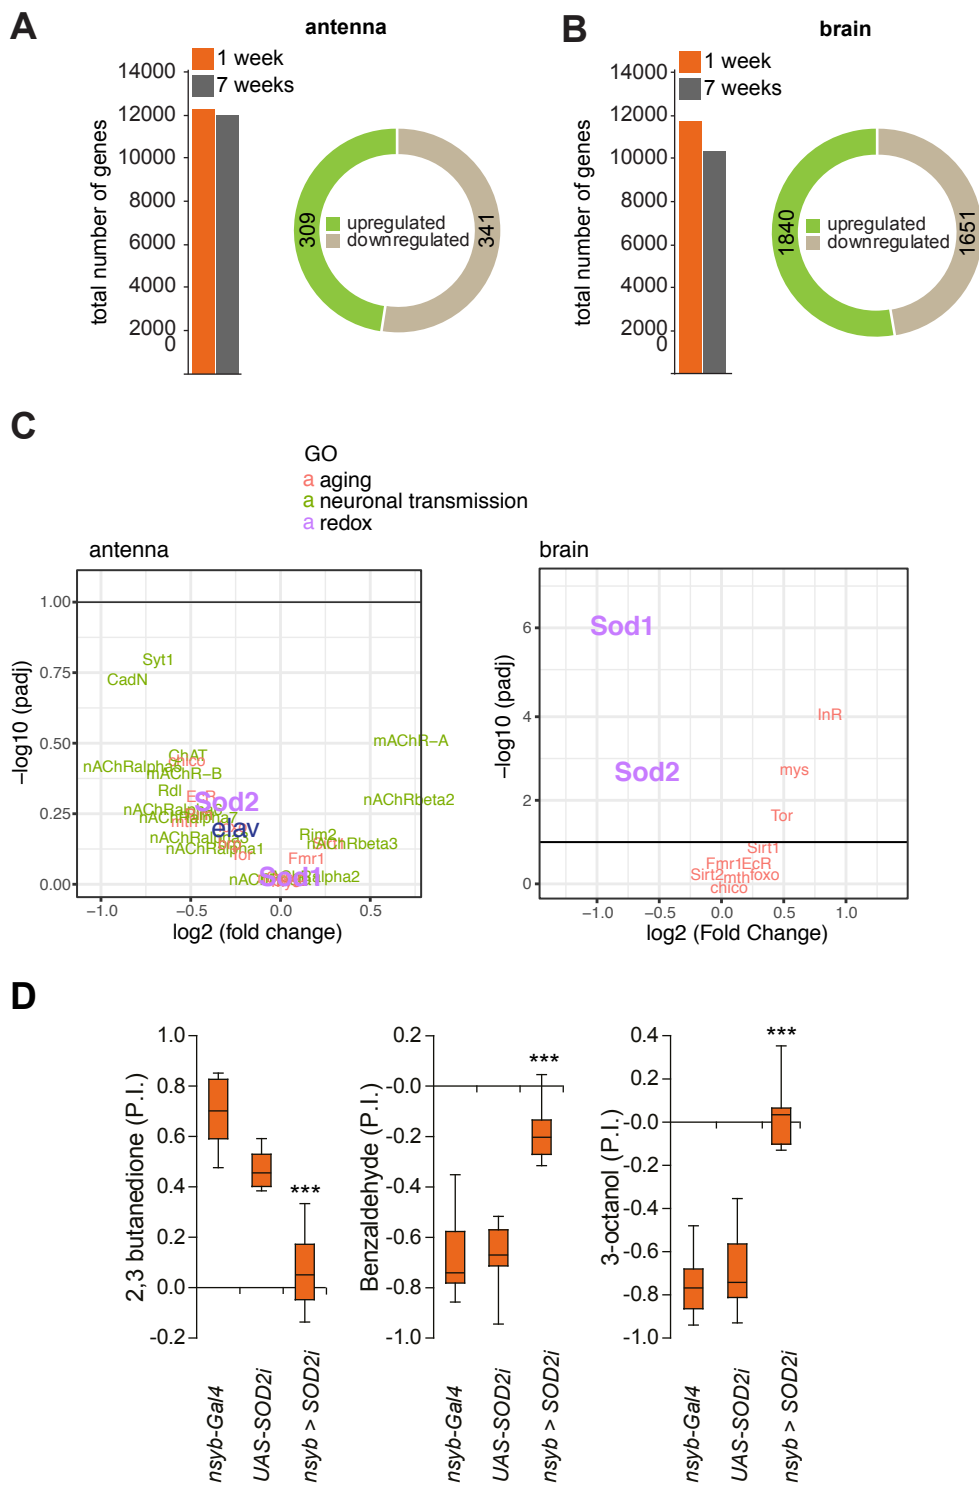

Supplement: supp [file elife-32018-supp-v1.zip › elife_poa_e32018_Figure_4_figure_supplement_2.pdf]

Fig. 4- Fig. Supplement 3

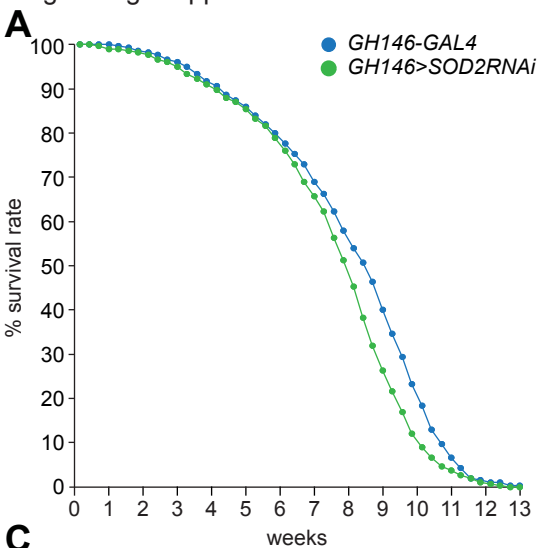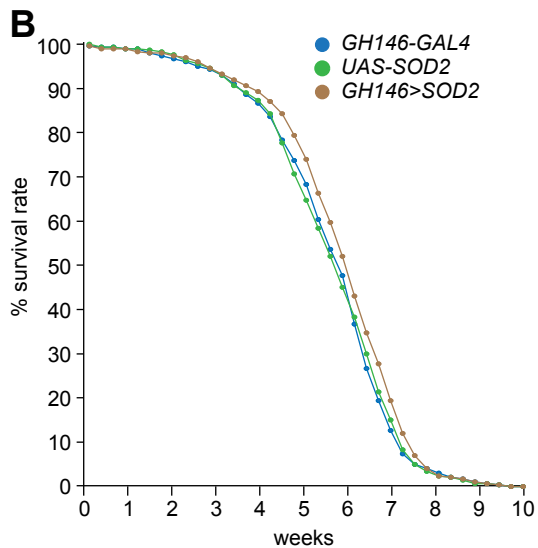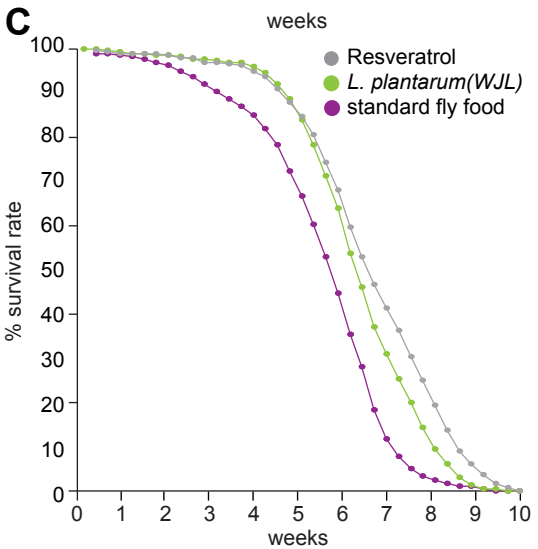

Supplement: supp [file elife-32018-supp-v1.zip › elife_poa_e32018_Figure_4_figure_supplement_3.pdf]

Fig. 2- Fig. Supplement 2

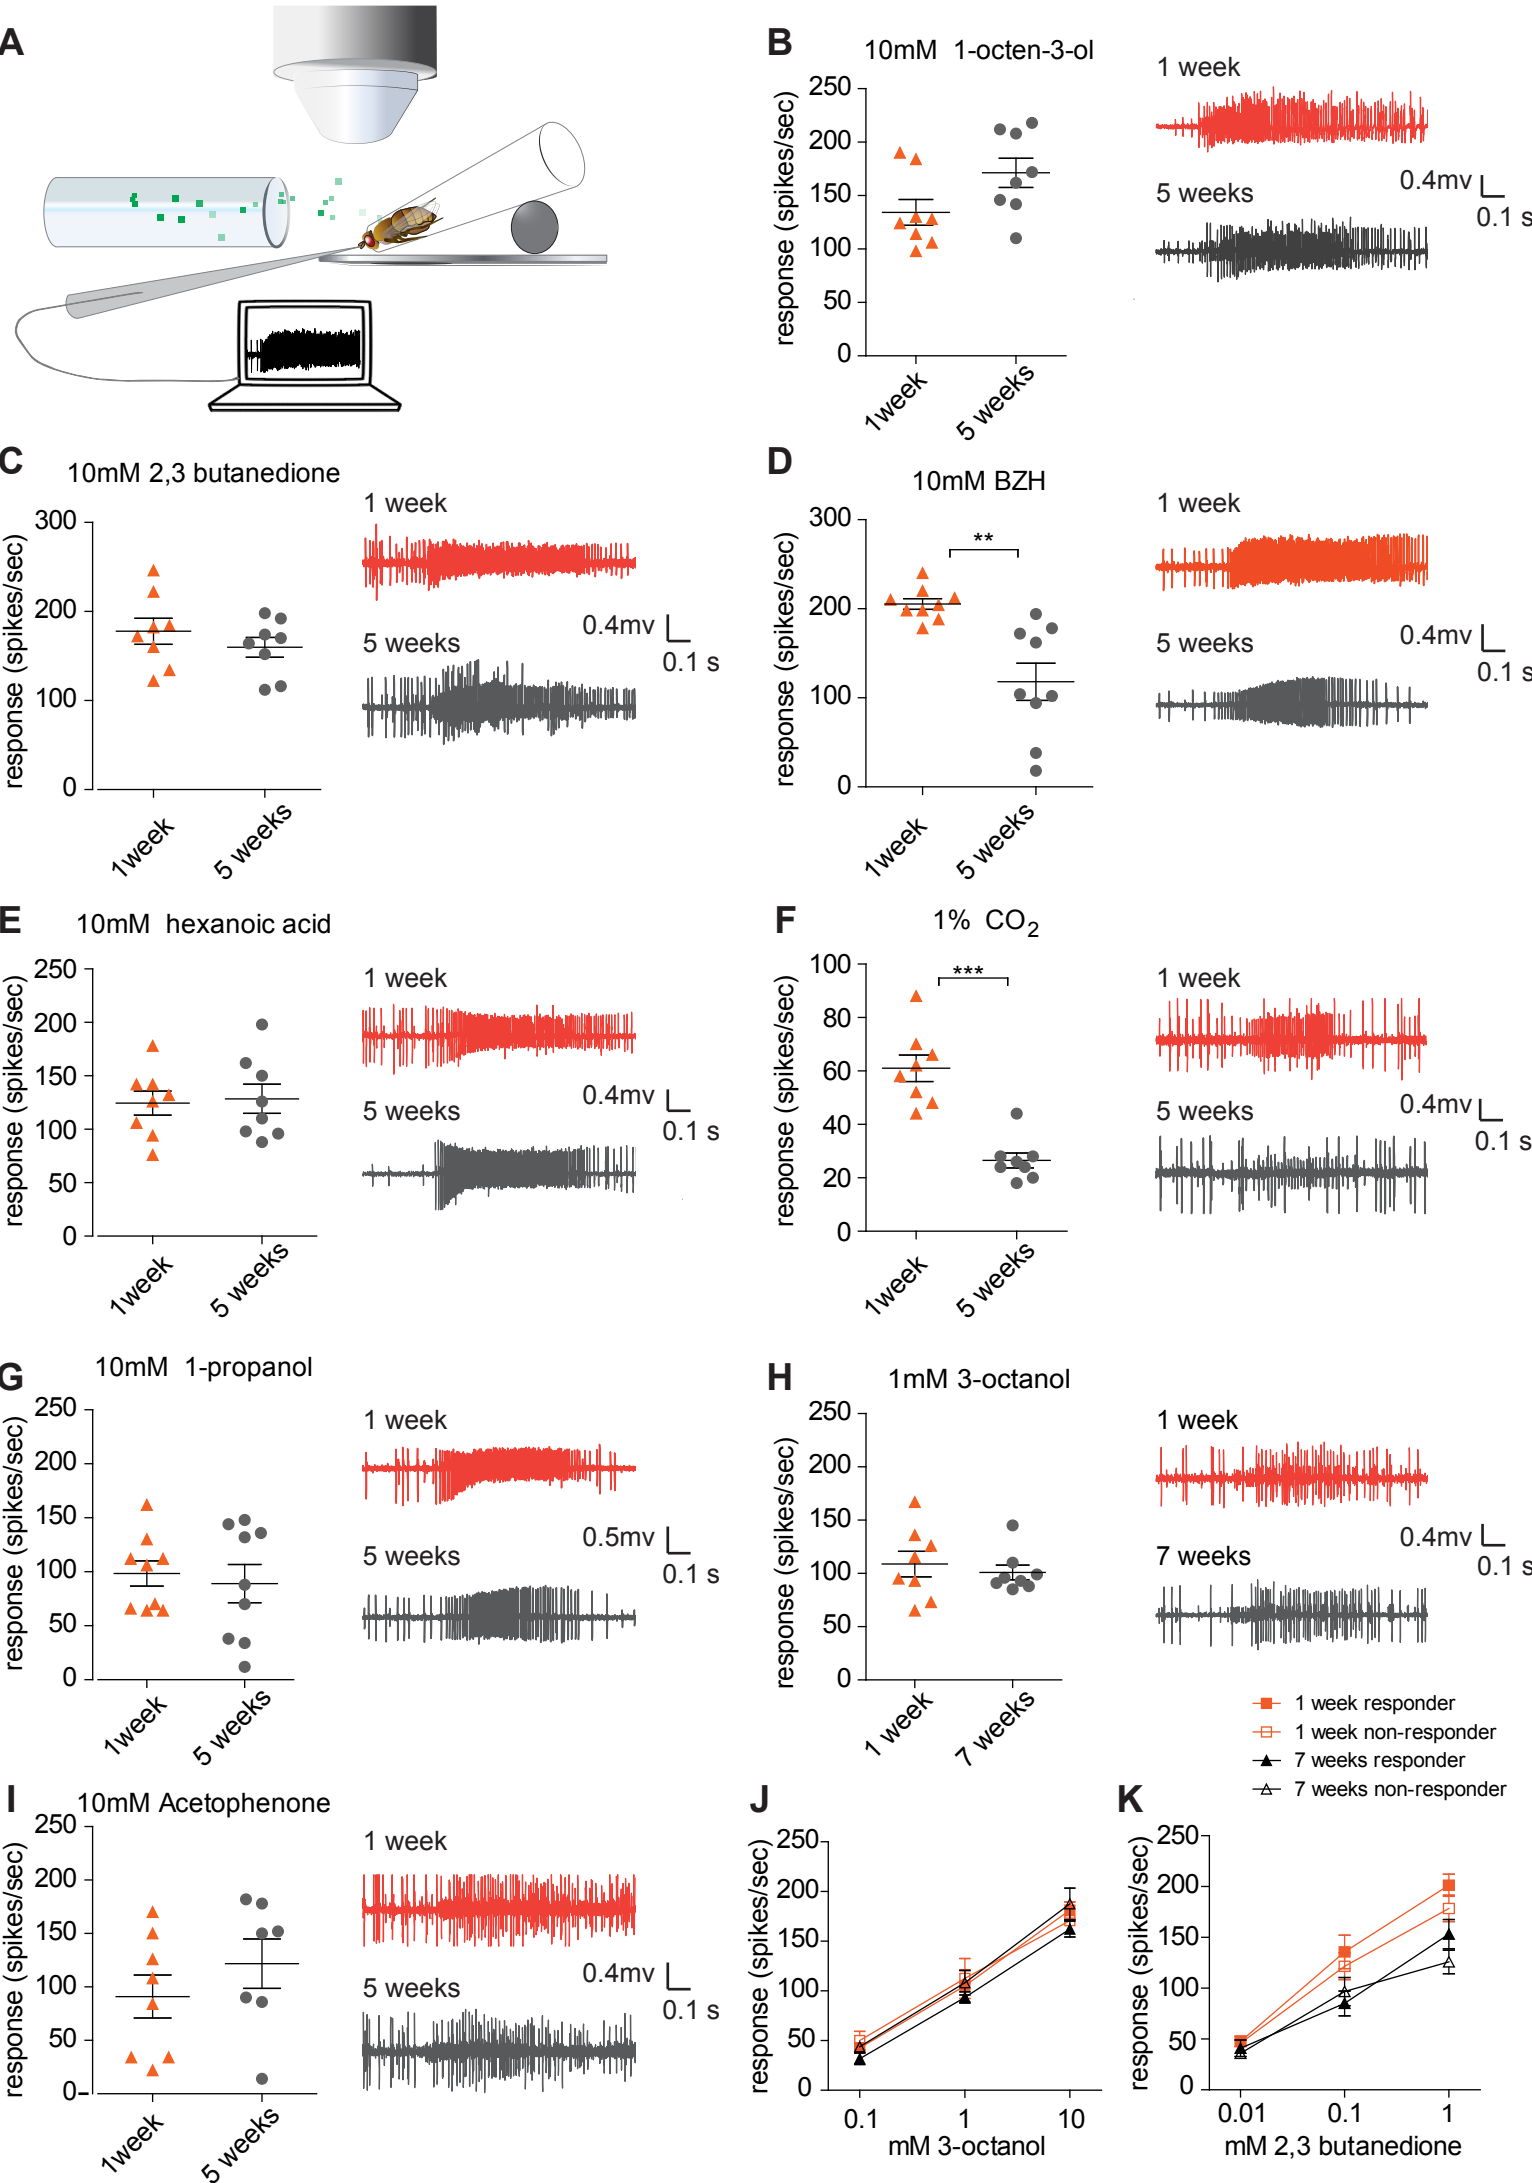

Supplement: supp [file elife-32018-supp-v1.zip › elife_poa_e32018_Figure_2_figure_supplement_2.pdf]

Fig. 2- Fig. Supplement 3

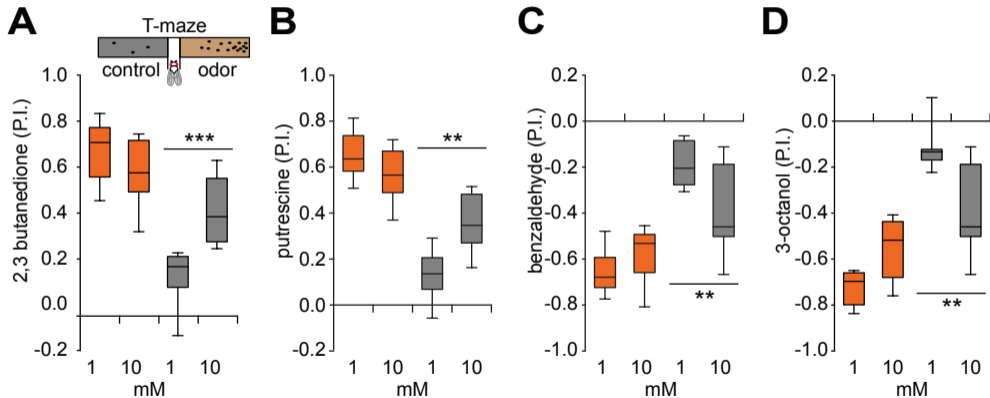

Supplement: supp [file elife-32018-supp-v1.zip › elife_poa_e32018_Figure_2_figure_supplement_3.pdf]

Fig. 2- Fig. Supplement 1

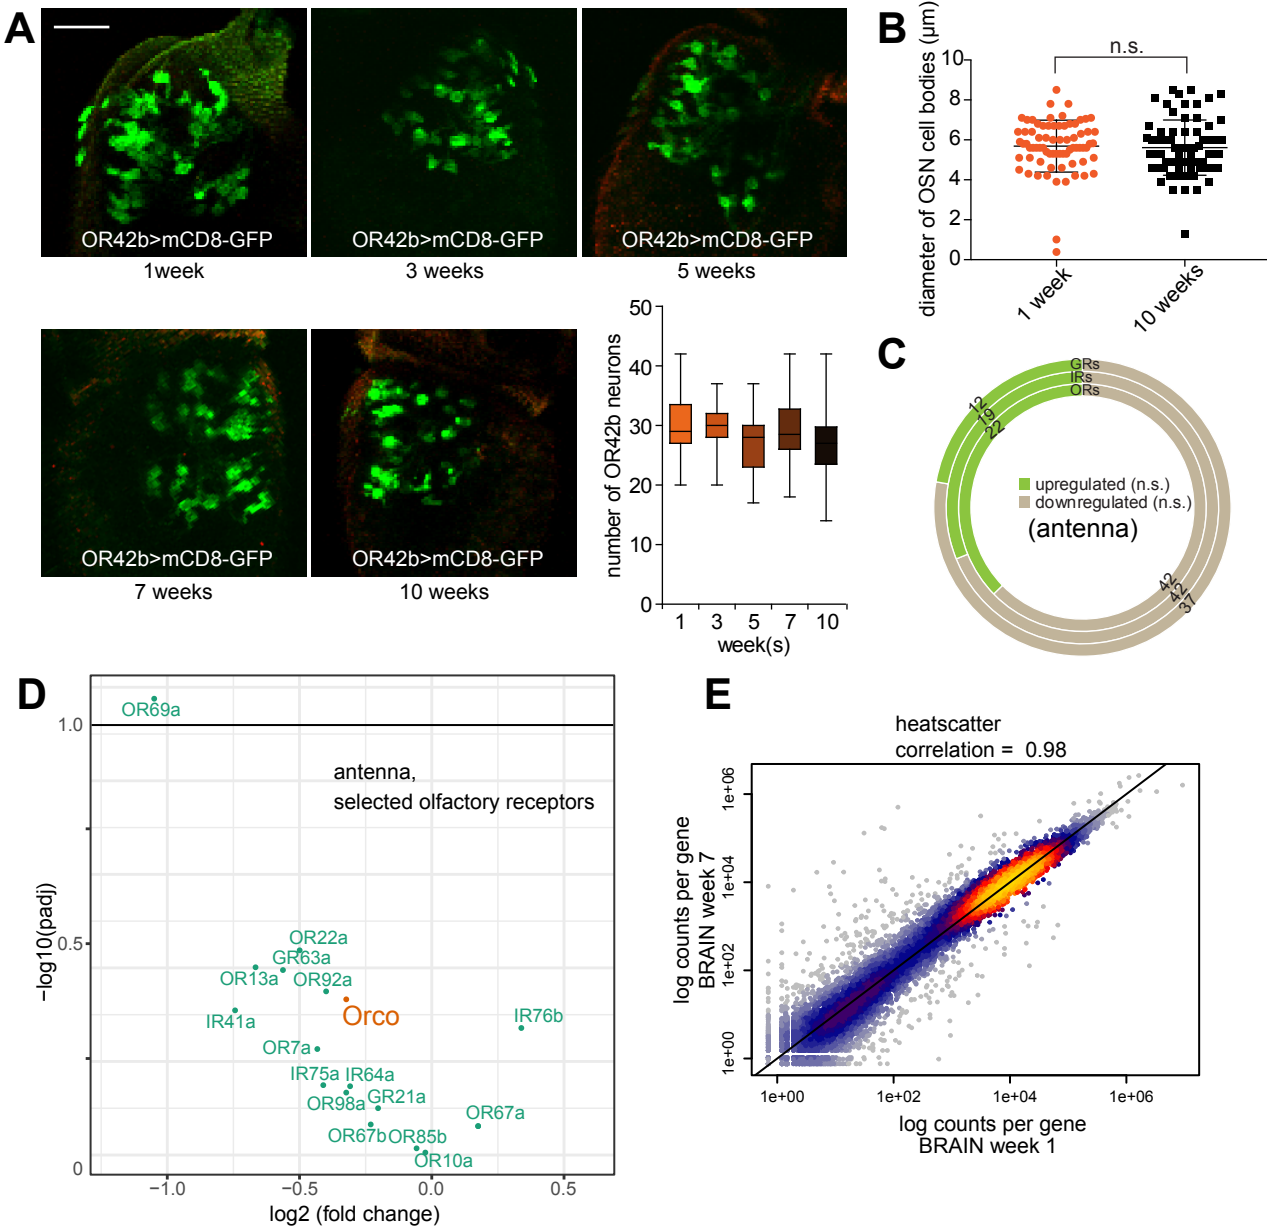

Supplement: supp [file elife-32018-supp-v1.zip › elife_poa_e32018_Figure_2_figure_supplement_1.pdf]

Fig. 6 - Fig. Supplement 1

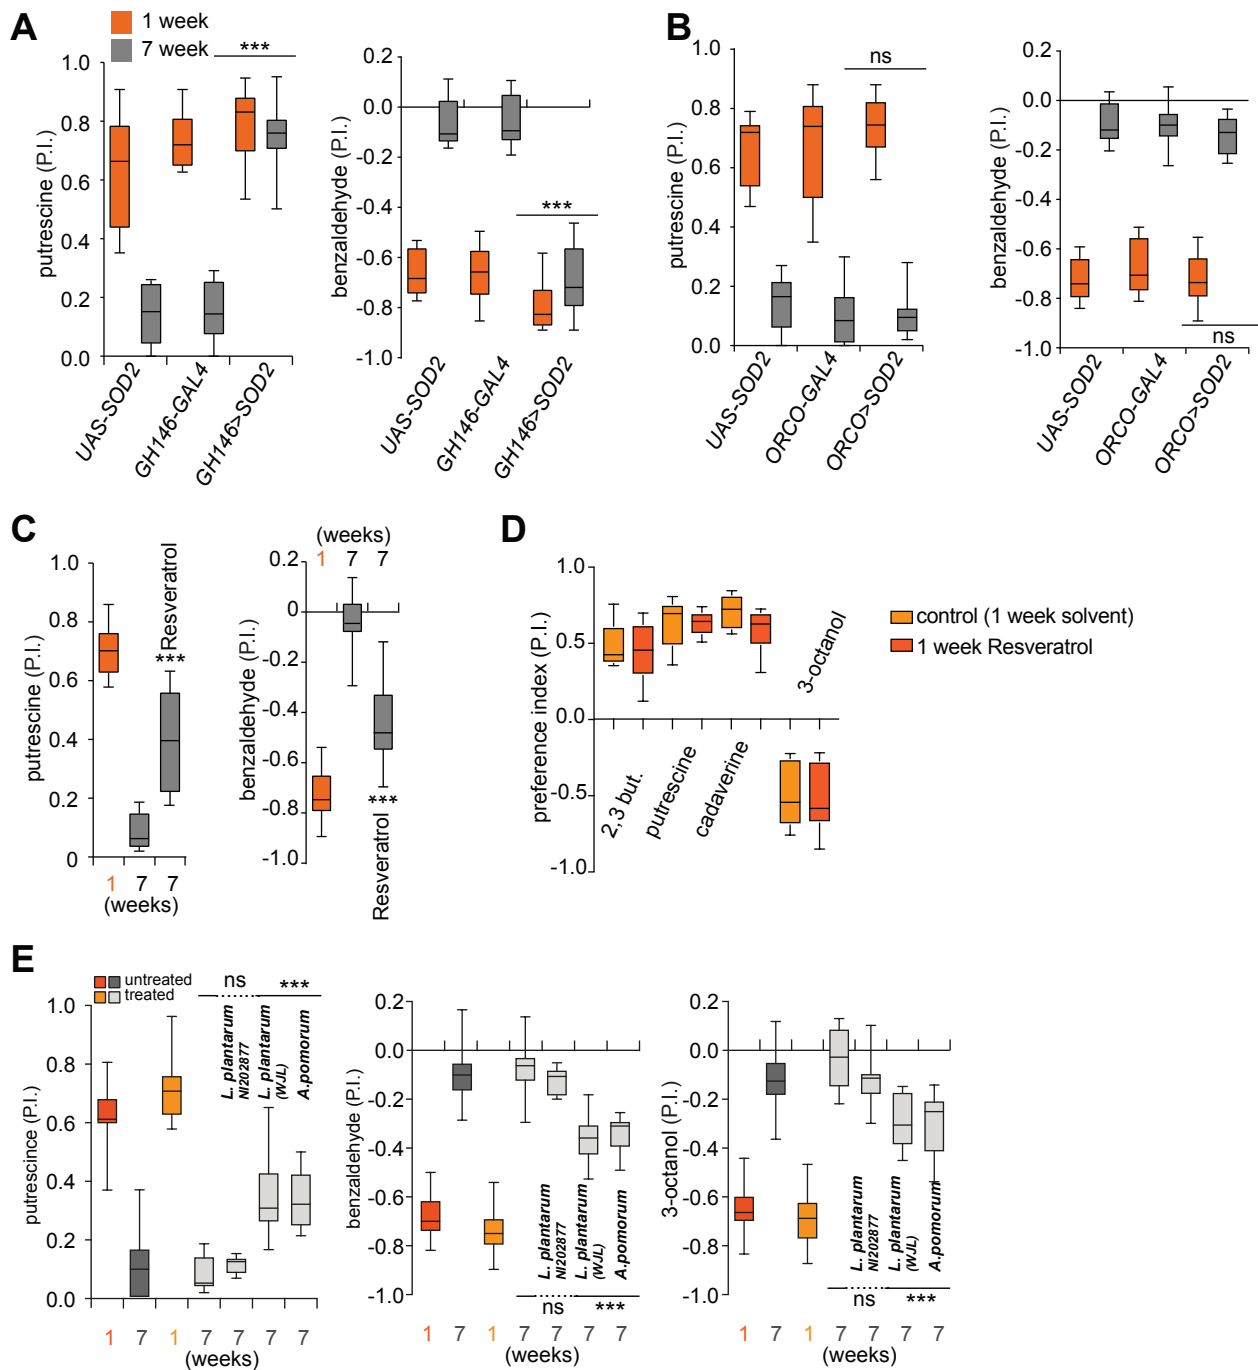

Supplement: supp [file elife-32018-supp-v1.zip › elife_poa_e32018_Figure_6_figure_supplement_1.pdf]

Fig. 1- Fig. Supplement 1

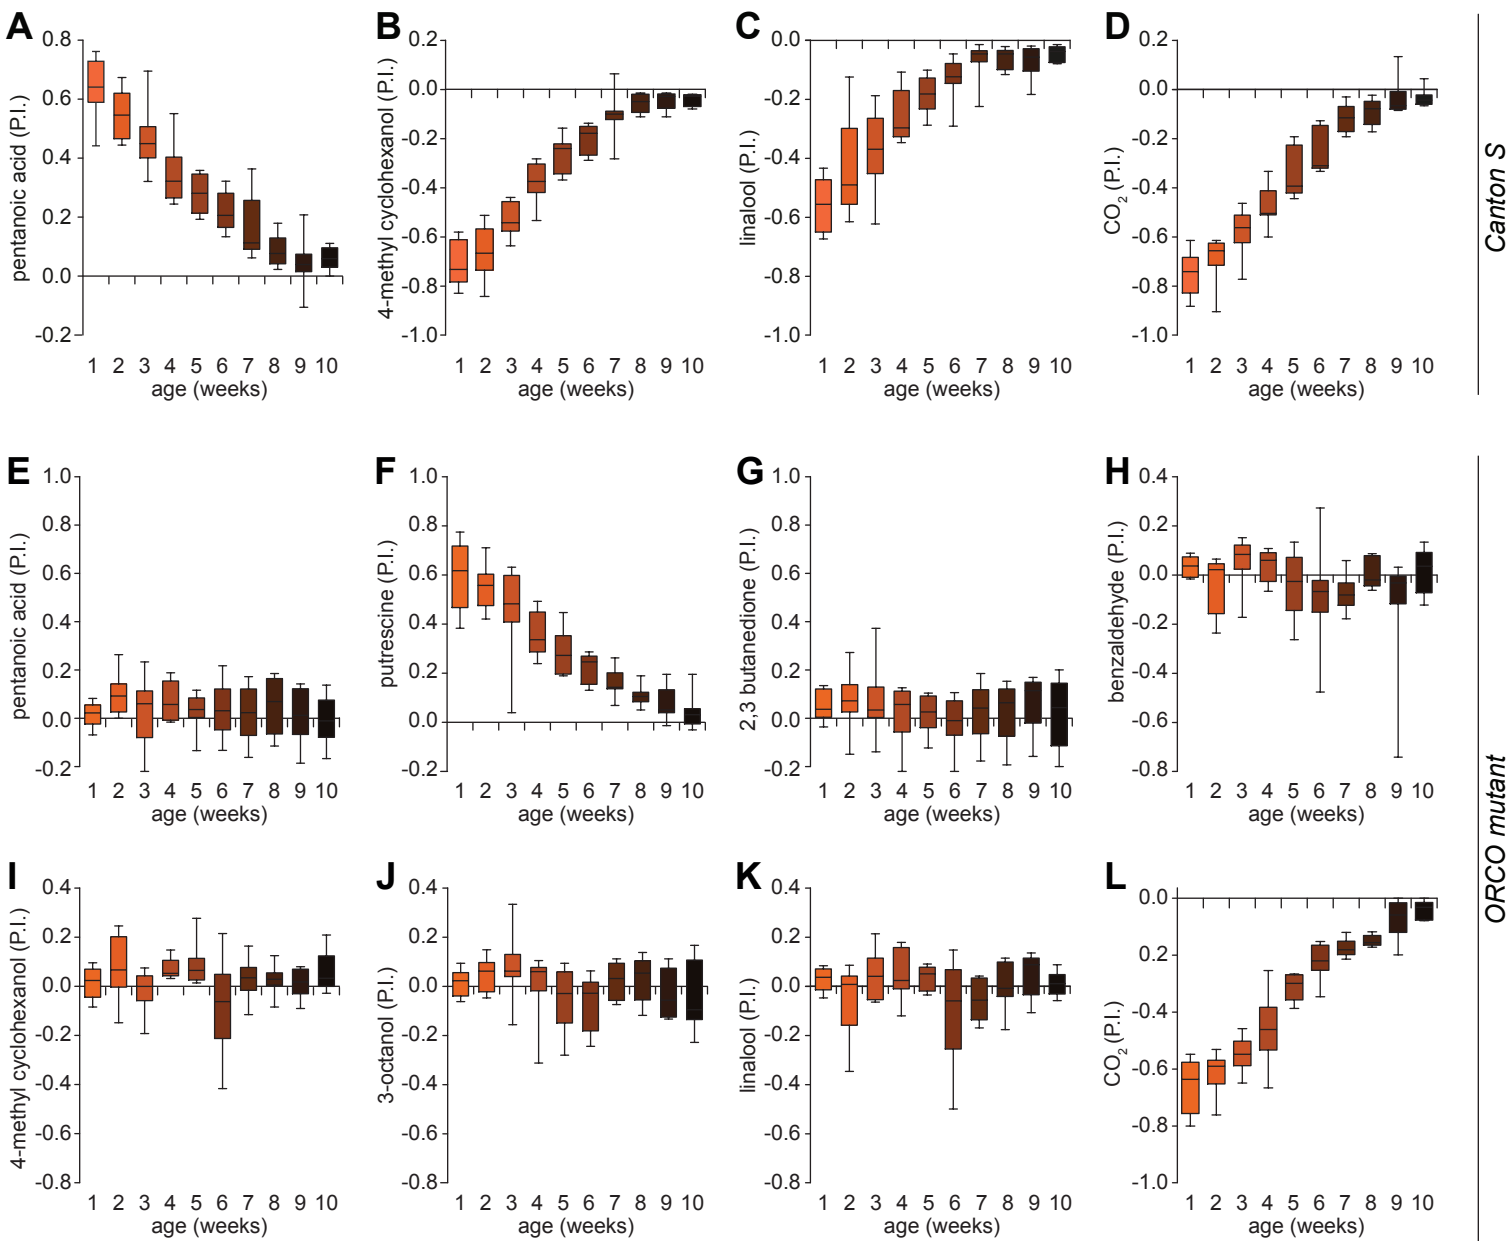

Supplement: supp [file elife-32018-supp-v1.zip › elife_poa_e32018_Figure_1_figure_supplement_1.pdf]
